# Supplementary material for: Effects of Prometryn Exposure on Hepatopancreas Oxidative Stress and Intestinal Flora in Eriocheir sinensis (Crustacea: Decapoda)
Source: MDPI journal article supplement (doi:10.3390/antiox12081548), 2023-08-02
Supplement: s1 [file s1]

Table S1. Primer sequence used for qRT-PCR.

| Category           | Gene           | Primers                                                  | Accession No.  |
|--------------------|----------------|----------------------------------------------------------|----------------|
| Internal reference | $\beta$ -actin | F: TCATCACCATCGGCAATGA<br>R: TTGTAAGTGGTCTCGTGGATG       | XM_050843218.1 |
|                    | Crustin        | F: GCTCTATGGCGGAGGATGTCA<br>R: CGGGCTTCAGACCCACTTTAC     | OK104808.1     |
| Immunity           | ALF1           | F: GCTGGCTGGACCGGATTATT<br>R: ATCACACGGGTGTTGCAGAT       | XM_050871541.1 |
|                    | ALF2           | F: TGTCACCCCGCCTCATTAAG<br>R: GTCAGAGACTCCCCCTGGAT       | XM_050871543.1 |
|                    | ALF3           | F: TCTATGGCACAACGACACCG<br>R: TGCCCTCGTGGTACAATTCC       | XM_050836286.1 |
|                    | TNF- $\alpha$  | F: GTGGACATCTGGTCAGTGGG<br>R: GGCTCATCTGAGGGATCTGC       | AB183467.1     |
| Inflammation       | TLR            | F: AGCTTGCCGATTCACTCA<br>R: CACAGCTCTTCCCTCCGTCAG        | XM_050878072.1 |
|                    | Myd88          | F: GCCATCGCAGTCGCCAAGTT<br>R: GGCATCCTGTTCATCCAGTTCTGAC  | XM_050877740.1 |
|                    | Relish         | F: TCTCCCTACTCTGACCATTCC<br>R: TTCCCACCATCTCACTCTTGT     | XM_050843538.1 |
|                    | Litaf          | F: TAAAGGCAAGGGAGGCTTCG<br>R: GAATGGAGCTTGAGGTGGCA       | KF892539.1     |
|                    | P38-MAPK       | F: CACTCATGGGTGCTGACCTC<br>R: TACTTGAGGCCTCGCAACAC       | JX489772.1     |
| Detoxication       | CYP-3          | F: CTCCACGACTACAAGATGTTACGC<br>R: CACCTCGTTCATGGTAAAGAGC | XM_050869950.1 |
|                    | CYP-4          | F: AAGACTTCGTGGAGGTGTTC<br>R: GCACAGCGTTATGTTGGTGAAG     | XM_050840850.1 |

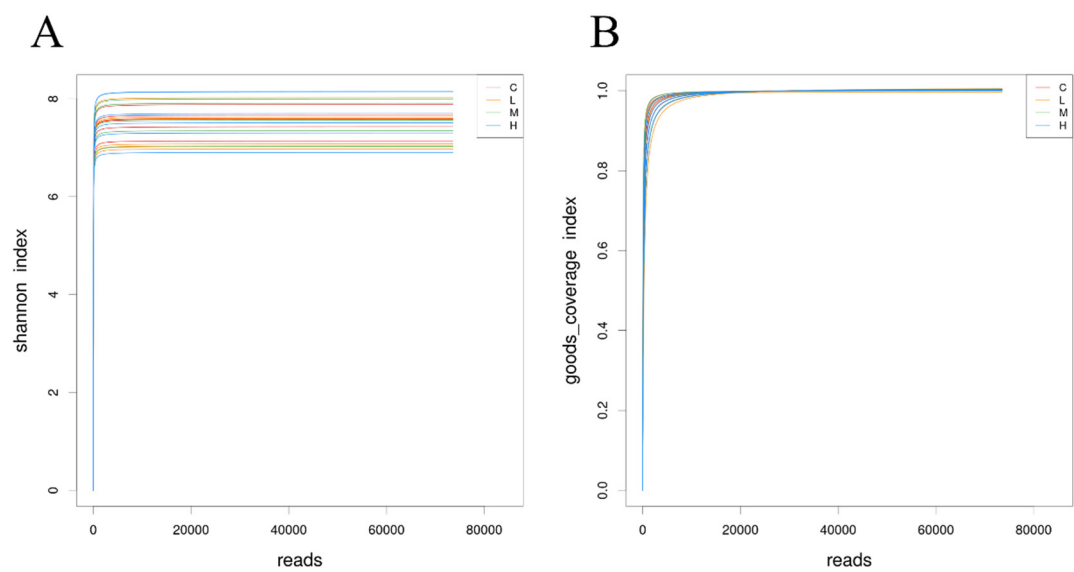

Figure S1. Shannon curves and good coverage index for each group of intestinal flora.
